# Supplementary material
Source: PubMed Central journal article supplement (PMC4293363)
Supplement: 13280_2014_575_MOESM1_ESM.pdf [file 13280_2014_575_MOESM1_ESM.pdf]

*AMBIO*

## **Electronic Supplementary Material**

Beaver-mediated methane emission: the effects of population growth in Eurasia and the Americas

### **Supplementary Material**

This section documents and describes additional sources of information used to generate our estimate of beaver-mediated global methane (CH<sub>4</sub>) emissions. Approaches for continental *Castor fiber* and *Castor canadensis* population estimation in Eurasia, North America and South America (Tierra del Fuego: TdF) are described in Table S1. *Castor canadensis* density data for North America used to quantify the size of this population are in Table S2. Methane efflux rates for rivers and streams used to calculate background emissions (preceding pond formation) are in Table S3.

**Table S1** Summary of methods used to estimate population size.

| Region                             | South America                                                                                                                                                                                                                                                                                                                                                                                                                                                                                      | North America                                                                                                                                                                                                                                                                                                                                                                                                                                                                                                                                                                                                                                  | Eurasia                                                                                                                                                                                              |
|------------------------------------|----------------------------------------------------------------------------------------------------------------------------------------------------------------------------------------------------------------------------------------------------------------------------------------------------------------------------------------------------------------------------------------------------------------------------------------------------------------------------------------------------|------------------------------------------------------------------------------------------------------------------------------------------------------------------------------------------------------------------------------------------------------------------------------------------------------------------------------------------------------------------------------------------------------------------------------------------------------------------------------------------------------------------------------------------------------------------------------------------------------------------------------------------------|------------------------------------------------------------------------------------------------------------------------------------------------------------------------------------------------------|
| Estimate type                      | Colonies                                                                                                                                                                                                                                                                                                                                                                                                                                                                                           | Colonies                                                                                                                                                                                                                                                                                                                                                                                                                                                                                                                                                                                                                                       | Individuals                                                                                                                                                                                          |
| Species                            | <i>C. canadensis</i>                                                                                                                                                                                                                                                                                                                                                                                                                                                                               | <i>C. canadensis</i>                                                                                                                                                                                                                                                                                                                                                                                                                                                                                                                                                                                                                           | <i>C. fiber</i> & <i>C. canadensis</i>                                                                                                                                                               |
| Method description                 | Scaled stream-length based densities (Lizarralde 1993; Skewes et al. 2006) reported for different landscape types according to stream network length (Parkes et al. 2008) and landscape types of Isla Grande. While all basins have been colonized, we assumed only 80–90% of stream length was inhabited. Average stream-length based density for Isla Grande and stream network length of three other (Chilean) colonized islands (Anderson et al. 2009) was used to quantify their populations. | Applied a stratified approach based on Level I ecoregion areas (Cooperation 1997), classified as high, moderate or low population density. Used all available density data (Table S2; both area-based estimates and stream length-based estimates of colony and dam frequencies) to establish a length to area conversion factor (for high density ecoregions: Table S2). Converted length-based population data for low and medium density areas to area-based numbers using the established conversion factor and assuming constant stream network density. Calculated population sizes using ecoregion areas with known beaver populations. | Compiled historical population (both species) data (Veron 1992; Nolet and Rosell 1998; Halley and Rosell 2003) for 23 countries. Established growth curves (1900–2000) for each country and species. |
| Colony size range                  | 4–6 individuals per colony (Skewes et al. 2006).                                                                                                                                                                                                                                                                                                                                                                                                                                                   | 4–7 individuals per colony (Gurnell 1998; Novak 1999).                                                                                                                                                                                                                                                                                                                                                                                                                                                                                                                                                                                         | <i>C. fiber</i> : 3–5 individuals per colony; <i>C. canadensis</i> : 4–6 individuals per colony (Gurnell 1998).                                                                                      |
| Historical reconstruction approach | Rapid growth followed by stabilization and decline (Parkes et al. 2008). Modified for assumption of initial exponential growth). First introduction in 1946 (Sielfeld and Venegas 1980).                                                                                                                                                                                                                                                                                                           | Exponential (assumed from data for <i>C. fiber</i> population recovery in Europe) following population minimum c. 1900.                                                                                                                                                                                                                                                                                                                                                                                                                                                                                                                        | ~Exponential (see Figure 3). Population minimum c. 1900 ( <i>C. fiber</i> ). <i>C. canadensis</i> introduced in 1930s (Nolet and Rosell 1998).                                                       |

**Table S2** Summary of stream length-based density data for ecoregions of North America, and area-based density estimates for (three) ecoregions classified as high beaver density.

| Ecoregion                       | Density           | Unit                    | Reference                        |
|---------------------------------|-------------------|-------------------------|----------------------------------|
| northwestern forested mountains | 0.38              | colony km <sup>-1</sup> | Beier and Barrett (1987)         |
| eastern temperate forests       | 0.83              | colony km <sup>-1</sup> | Howard and Larson (1985)         |
| northern forests                | 1.25              | colony km <sup>-1</sup> | Nordstrom (1972)                 |
| great plains                    | 0.90              | colony km <sup>-1</sup> | Collins (1976)                   |
| eastern temperate forests       | 0.76              | colony km <sup>-1</sup> | Fleming (1977)                   |
| taiga                           | 0.35              | colony km <sup>-1</sup> | Dennington and Johnson (1974)    |
| great plains                    | 0.44              | colony km <sup>-1</sup> | Novakowski (1965)                |
| taiga                           | 0.40              | colony km <sup>-1</sup> | Müller-Schwarz and Sun (2003)    |
| eastern temperate forests       | 0.54              | colony km <sup>-1</sup> | Müller-Schwarz and Sun (2003)    |
| eastern temperate forests       | 0.55              | colony km <sup>-1</sup> | Müller-Schwarz and Sun (2003)    |
| eastern temperate forests       | 0.58              | colony km <sup>-1</sup> | Müller-Schwarz and Sun (2003)    |
| great plains                    | 0.81              | colony km <sup>-1</sup> | Müller-Schwarz and Sun (2003)    |
| eastern temperate forests       | 1.00              | colony km <sup>-1</sup> | Müller-Schwarz and Sun (2003)    |
| eastern temperate forests       | 1.09              | colony km <sup>-1</sup> | Müller-Schwarz and Sun (2003)    |
| northern forests                | 3.53 <sup>a</sup> | colony km <sup>-1</sup> | Naiman et al. (1986)             |
| northern forests                | 0.83 <sup>a</sup> | colony km <sup>-1</sup> | Naiman et al. (1988)             |
| marine west coast forests       | 0.38 <sup>a</sup> | colony km <sup>-1</sup> | Leidholt-Bruner et al. (1992)    |
| hudson plain                    | 4.77 <sup>a</sup> | colony km <sup>-1</sup> | Woo and Waddington (1990)        |
| great plains                    | 0.05 <sup>a</sup> | colony km <sup>-1</sup> | McComb et al. (1990)             |
| northwestern forested mountains | 1.66 <sup>a</sup> | colony km <sup>-1</sup> | Ruedemann and Schoonmaker (1938) |
| northern forests                | 1.02              | colony km <sup>-2</sup> | Broschart et al. (1989)          |
| northern forests                | 0.15              | colony km <sup>-2</sup> | Bergerud and Miller (1977)       |
| northern forests                | 0.54              | colony km <sup>-2</sup> | Bergerud and Miller (1977)       |
| northern forests                | 1.15              | colony km <sup>-2</sup> | Hall (1971)                      |
| northern forests                | 0.58              | colony km <sup>-2</sup> | Voigt et al. (1976)              |
| northern forests                | 0.90              | colony km <sup>-2</sup> | Novak (1999)                     |
| northern forests                | 3.0 <sup>b</sup>  | colony km <sup>-2</sup> | Novak (1999)                     |
| northern forests                | 0.14              | colony km <sup>-2</sup> | Larsen and Gunson (1983)         |
| northern forests                | 0.56              | colony km <sup>-2</sup> | Larsen and Gunson (1983)         |
| northern forests                | 0.59              | colony km <sup>-2</sup> | Larsen and Gunson (1983)         |
| northern forests                | 0.89              | colony km <sup>-2</sup> | Larsen and Gunson (1983)         |
| taiga                           | 0.39              | colony km <sup>-2</sup> | Aleksiuk (1968)                  |
| taiga                           | 0.23              | colony km <sup>-2</sup> | Larsen and Gunson (1983)         |
| hudson plain                    | 0.30              | colony km <sup>-2</sup> | Novak (1999)                     |

<sup>a</sup>Calculated from dam density assuming 2.5 dams per colony

<sup>b</sup>Outlier not used for calculation of average area-based density

**Table S3** Methane evasion rates for rivers and streams ( $\text{g m}^{-2} \text{yr}^{-1}$ ) used to estimate background emission rates from streams<sup>a</sup>.

| Region        | Efflux  | Reference                                                                                                                    |
|---------------|---------|------------------------------------------------------------------------------------------------------------------------------|
| North America | 0.7-58  | Kling et al. (1992); De Angelis and Scranton (1993); Lilley et al. (1996); Jones and Mulholland (1998); Baulch et al. (2011) |
| Europe        | 0.1-0.8 | Hope et al. (2001); Hlavacova et al. (2006)                                                                                  |
| Oceania       | 2-24    | Wilcock and Sorrell (2008)                                                                                                   |
| South America | 10      | Smith et al. (2000)                                                                                                          |

<sup>a</sup> The stream area used to estimate background emissions was derived for a range in pond sizes ( $300\text{--}120\,000 \text{ m}^2$ ) by using a (first order) stream width of 0.8 m (Downing et al. 2012) and stream length calculated assuming circular ponds and straight reaches. This yielded an estimate for stream area consumed by the pond after damming ranging from  $\sim 0.2\text{--}2\%$  of the pond area.

## References

- Aleksiuk, M. 1968. Scent-mound communication, territoriality, and population regulation in beaver (*Castor canadensis* Kuhl). *Journal of Mammalogy* 49: 759–762.
- Anderson, C.B., G.M. Pastur, M.V. Lencinas, P.K. Wallem, M.C. Moorman and A.D. Rosemond. 2009. Do introduced North American beavers *Castor canadensis* engineer differently in southern South America? An overview with implications for restoration. *Mammal Review* 39: 33–52.
- Baulch, H.M., P.J. Dillon, R. Maranger and S.L. Schiff. 2011. Diffusive and ebullitive transport of methane and nitrous oxide from streams: Are bubble-mediated fluxes important? *Journal of Geophysical Research-Biogeosciences* 116: 1–15.
- Beier, P. and R.H. Barrett. 1987. Beaver habitat use and impact in Truckee River Basin, California. *Journal of Wildlife Management* 51: 794–799.
- Bergerud, A.T. and D.R. Miller. 1977. Population dynamics of Newfoundland beaver. *Canadian Journal of Zoology* 55: 1480–1492.
- Broschart, M.R., C.A. Johnston and R.J. Naiman. 1989. Predicting beaver colony density in boreal landscapes. *Journal of Wildlife Management* 53: 929–934.
- Collins, T.C. 1976. Population characteristics and habitat relationships of beavers, *Castor canadensis*, in northwest Wyoming. PhD. Laramie, USA: University of Wyoming.
- Commission for Environmental Cooperation. 1997. Ecological Regions of North America. Montreal, Canada. pp. 60.
- De Angelis, M.A. and M.I. Scranton. 1993. Fate of methane in the Hudson River Estuary. *Global Biogeochemical Cycles* 7: 509–523.
- Dennington, M. and B. Johnson, 1974. Studies of beaver habitat in the Mackenzie Valley and northern Yukon. Task force on northern oil development. 1–171.
- Downing, J.A., J.J. Cole, C.M. Duarte, J.J. Middelburg, J.M. Melack, Y.T. Prairie, P. Kortelainen, R.G. Striegl, et al. 2012. Global abundance and size distribution of streams and rivers. *Inland Waters* 2: 229–236.
- Fleming, M.W. 1977. Induced sterility of adult male beaver (*Castor canadensis*) and colony fecundity. MSc. Amherst, USA: University of Massachusetts.
- Gurnell, A.M. 1998. The hydrogeomorphological effects of beaver dam-building activity. *Progress in Physical Geography* 22: 167–189.
- Hall, A.M. 1971. Ecology of beaver and selection of prey by wolves in central Ontario. MSc. Toronto, Canada: University of Toronto.

Halley, D.J. and F. Rosell. 2003. Population and distribution of European beavers (*Castor fiber*). *Lutra* 46: 91–101.

Hlavacova, E., M. Rulik, L. Cap and V. Mach. 2006. Greenhouse gas (CO<sub>2</sub>, CH<sub>4</sub>, and N<sub>2</sub>O) emissions to the atmosphere from a small lowland stream in Czech Republic. *Archiv fur Hydrobiologie* 165: 339–353.

Hope, D., S.M. Palmer, M.F. Billett and J.J.C. Dawson. 2001. Carbon dioxide and methane evasion from a temperate peatland stream. *Limnology and Oceanography* 46: 847–857.

Howard, R.J. and J.S. Larson. 1985. A stream habitat classification system for beaver. *Journal of Wildlife Management* 49: 19–25.

Jones, J.B. and P.J. Mulholland. 1998. Methane input and evasion in a hardwood forest stream: Effects of subsurface flow from shallow and deep pathways. *Limnology and Oceanography* 43: 1243–1250.

Kling, G.W., G.W. Kipphut and M.C. Miller. 1992. The flux of CO<sub>2</sub> and CH<sub>4</sub> from lakes and rivers in arctic Alaska. *Hydrobiologia* 240: 23–36.

Larsen, J.S. and J.R. Gunson. 1983. Status of the beaver in North America. *Acta Zoologica Fennica* 174: 91–93.

Leidholt-Bruner, K., D.E. Hibbs and W.C. McComb. 1992. Beaver dam locations and their effects on distribution and abundance of Coho salmon fry in two coastal Oregon streams. *Northwest Science* 66: 218–223.

Lilley, M.D., M.A. De Angelis and J.E. Olson. 1996. Methane concentrations and estimated fluxes from Pacific Northwest Rivers. *Mitt. Internat. Verein. Limnol.* 25: 187–196.

Lizarralde, M.S. 1993. Current status of the introduced beaver (*Castor canadensis*) population in Tierra del Fuego, Argentina. *Ambio* 22: 351–358.

McComb, W.C., J.R. Sedell and T.D. Buchholz. 1990. Dam-site selection by beavers in an eastern Oregon basin. *Great Basin Naturalist* 50: 273–281.

Müller-Schwarz, D. and L. Sun. 2003. *The beaver - natural history of a wetlands engineer*. Cornell University Press.

Naiman, R.J., J.M. Melillo and J.E. Hobbie. 1986. Ecosystem alteration of boreal forest streams by beaver (*Castor canadensis*). *Ecology* 67: 1254–1269.

Naiman, R.J., C.A. Johnston and J.C. Kelley. 1988. Alteration of North American streams by beaver. *Bioscience* 38: 753–762.

Nolet, B.A. and F. Rosell. 1998. Comeback of the beaver *Castor fiber*: an overview of old and new conservation problems. *Biological Conservation* 2: 165–173.

- Nordstrom, W.R. 1972. Comparison of trapped and untrapped beaver populations in New Brunswick. MSc. Fredericton, Canada: University of New Brunswick.
- Novak, M. 1999. *Beaver*. In Wild furbearer management and conservation in North America, M. Novak, J. A. Baker, M. E. Obbard and B. Malloch, 282–312. Queen's Printer for Ontario.
- Novakowski, N.S. 1965. Population dynamics of a beaver population in northern latitudes. PhD. Saskatoon, Canada: University of Saskatchewan.
- Parkes, J.P., J. Paulson, C.J. Donlan and K. Campbell. 2008. Control of North American beavers in Tierra del Fuego: feasibility of eradication and alternative management options. Landcare Research, LC0708/084, Lincoln, NZ.
- Ruedemann, R. and W.J. Schoonmaker. 1938. Beaver dams as geologic agents. *Science* 88: 523–525.
- Sielfeld, W. and C. Venegas. 1980. Poblamiento e impacto ambiental de *Castor canadensis* Kuhl, en Isla Navarino, Chile. *Anales del Instituto de la Patagonia (Chile)* 11: 247–257.
- Skewes, O., F. Gonzalez, R. Olave, A. Avila, V. Vargas, P. Paulsen and H.E. Konig. 2006. Abundance and distribution of American beaver, *Castor canadensis* (Kuhl 1820), in Tierra del Fuego and Navarino islands, Chile. *European Journal of Wildlife Research* 52: 292–296.
- Smith, L.K., W.M. Lewis, J.P. Chanton, G. Cronin and S.K. Hamilton. 2000. Methane emissions from the Orinoco River floodplain, Venezuela. *Biogeochemistry* 51: 113–140.
- Veron, G. 1992. Histoire biogéographique du castor d'Europe, *Castor fiber* (Rodentia, Mammalia). *Mammalia* 56: 87–108.
- Voigt, D.R., G.B. Kolenosky and D.H. Pimlott. 1976. Changes in summer foods of wolves in central Ontario. *Journal of Wildlife Management* 40: 663–668.
- Wilcock, R.J. and B.K. Sorrell. 2008. Emissions of greenhouse gases CH<sub>4</sub> and N<sub>2</sub>O from low-gradient streams in agriculturally developed catchments. *Water, Air, and Soil Pollution* 188: 155–170.
- Woo, M.-K. and J.M. Waddington. 1990. Effects of beaver dams on subarctic wetland hydrology. *Arctic* 43: 223–230.
